# Supplementary material for: Phytoplankton Dynamics and Biogeochemistry of the Black Sea
Source: Preprints.org preprint supplement (doi:10.20944/preprints202305.0480.v1), 2023-05-08
Supplement: Supplementary file 1 [file supplementary]

**Supplementary Materials for**

**Phytoplankton dynamics and biogeochemistry of the Black Sea.**

Vladimir Silkin*, Larisa Pautova, Oleg Podymov, Valeryi Chasovnikov, Anna Lifanchuk, Alexey Fedorov and Agnislava Kluchantseva

Shirshov Institute of Oceanology, Russian Academy of Sciences, Moscow, Russia,

* Corresponding author: vsilkin@mail.ru

This file includes:

Fig S1 -S3

Table S1 – S4


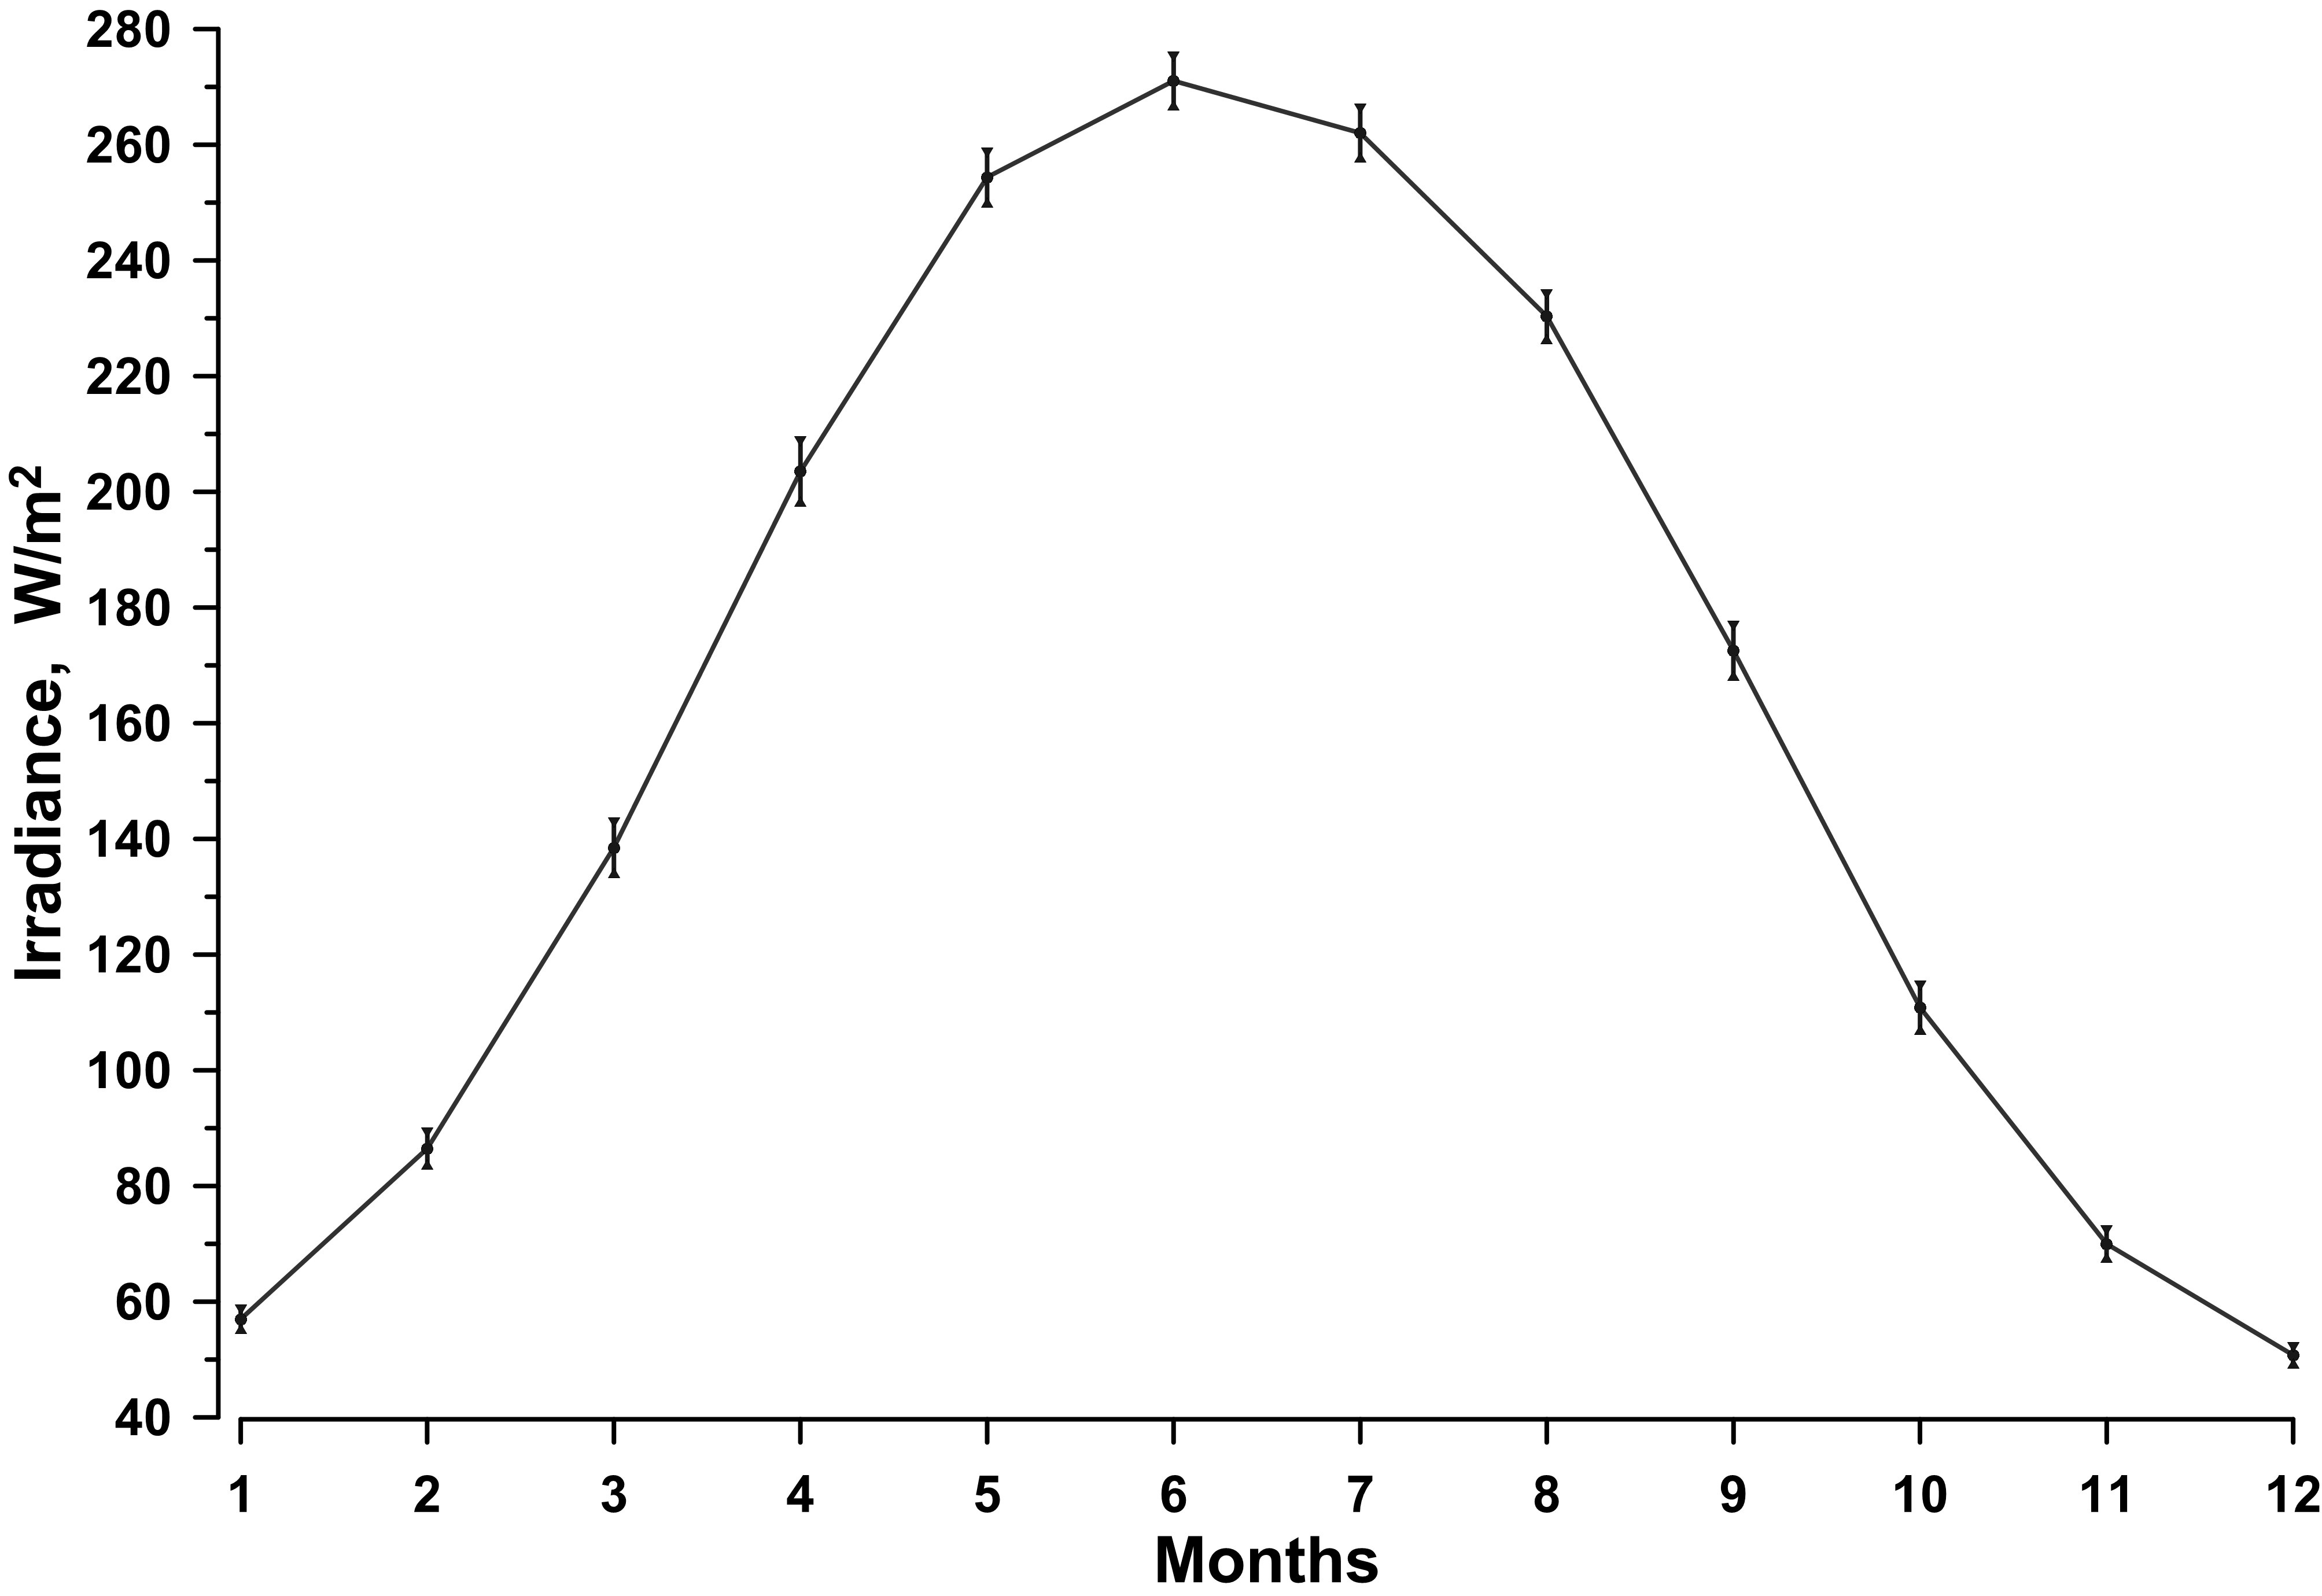


Fig S1. Annual irradiance dynamics on the water surface based on long-term (2006-2021) data.


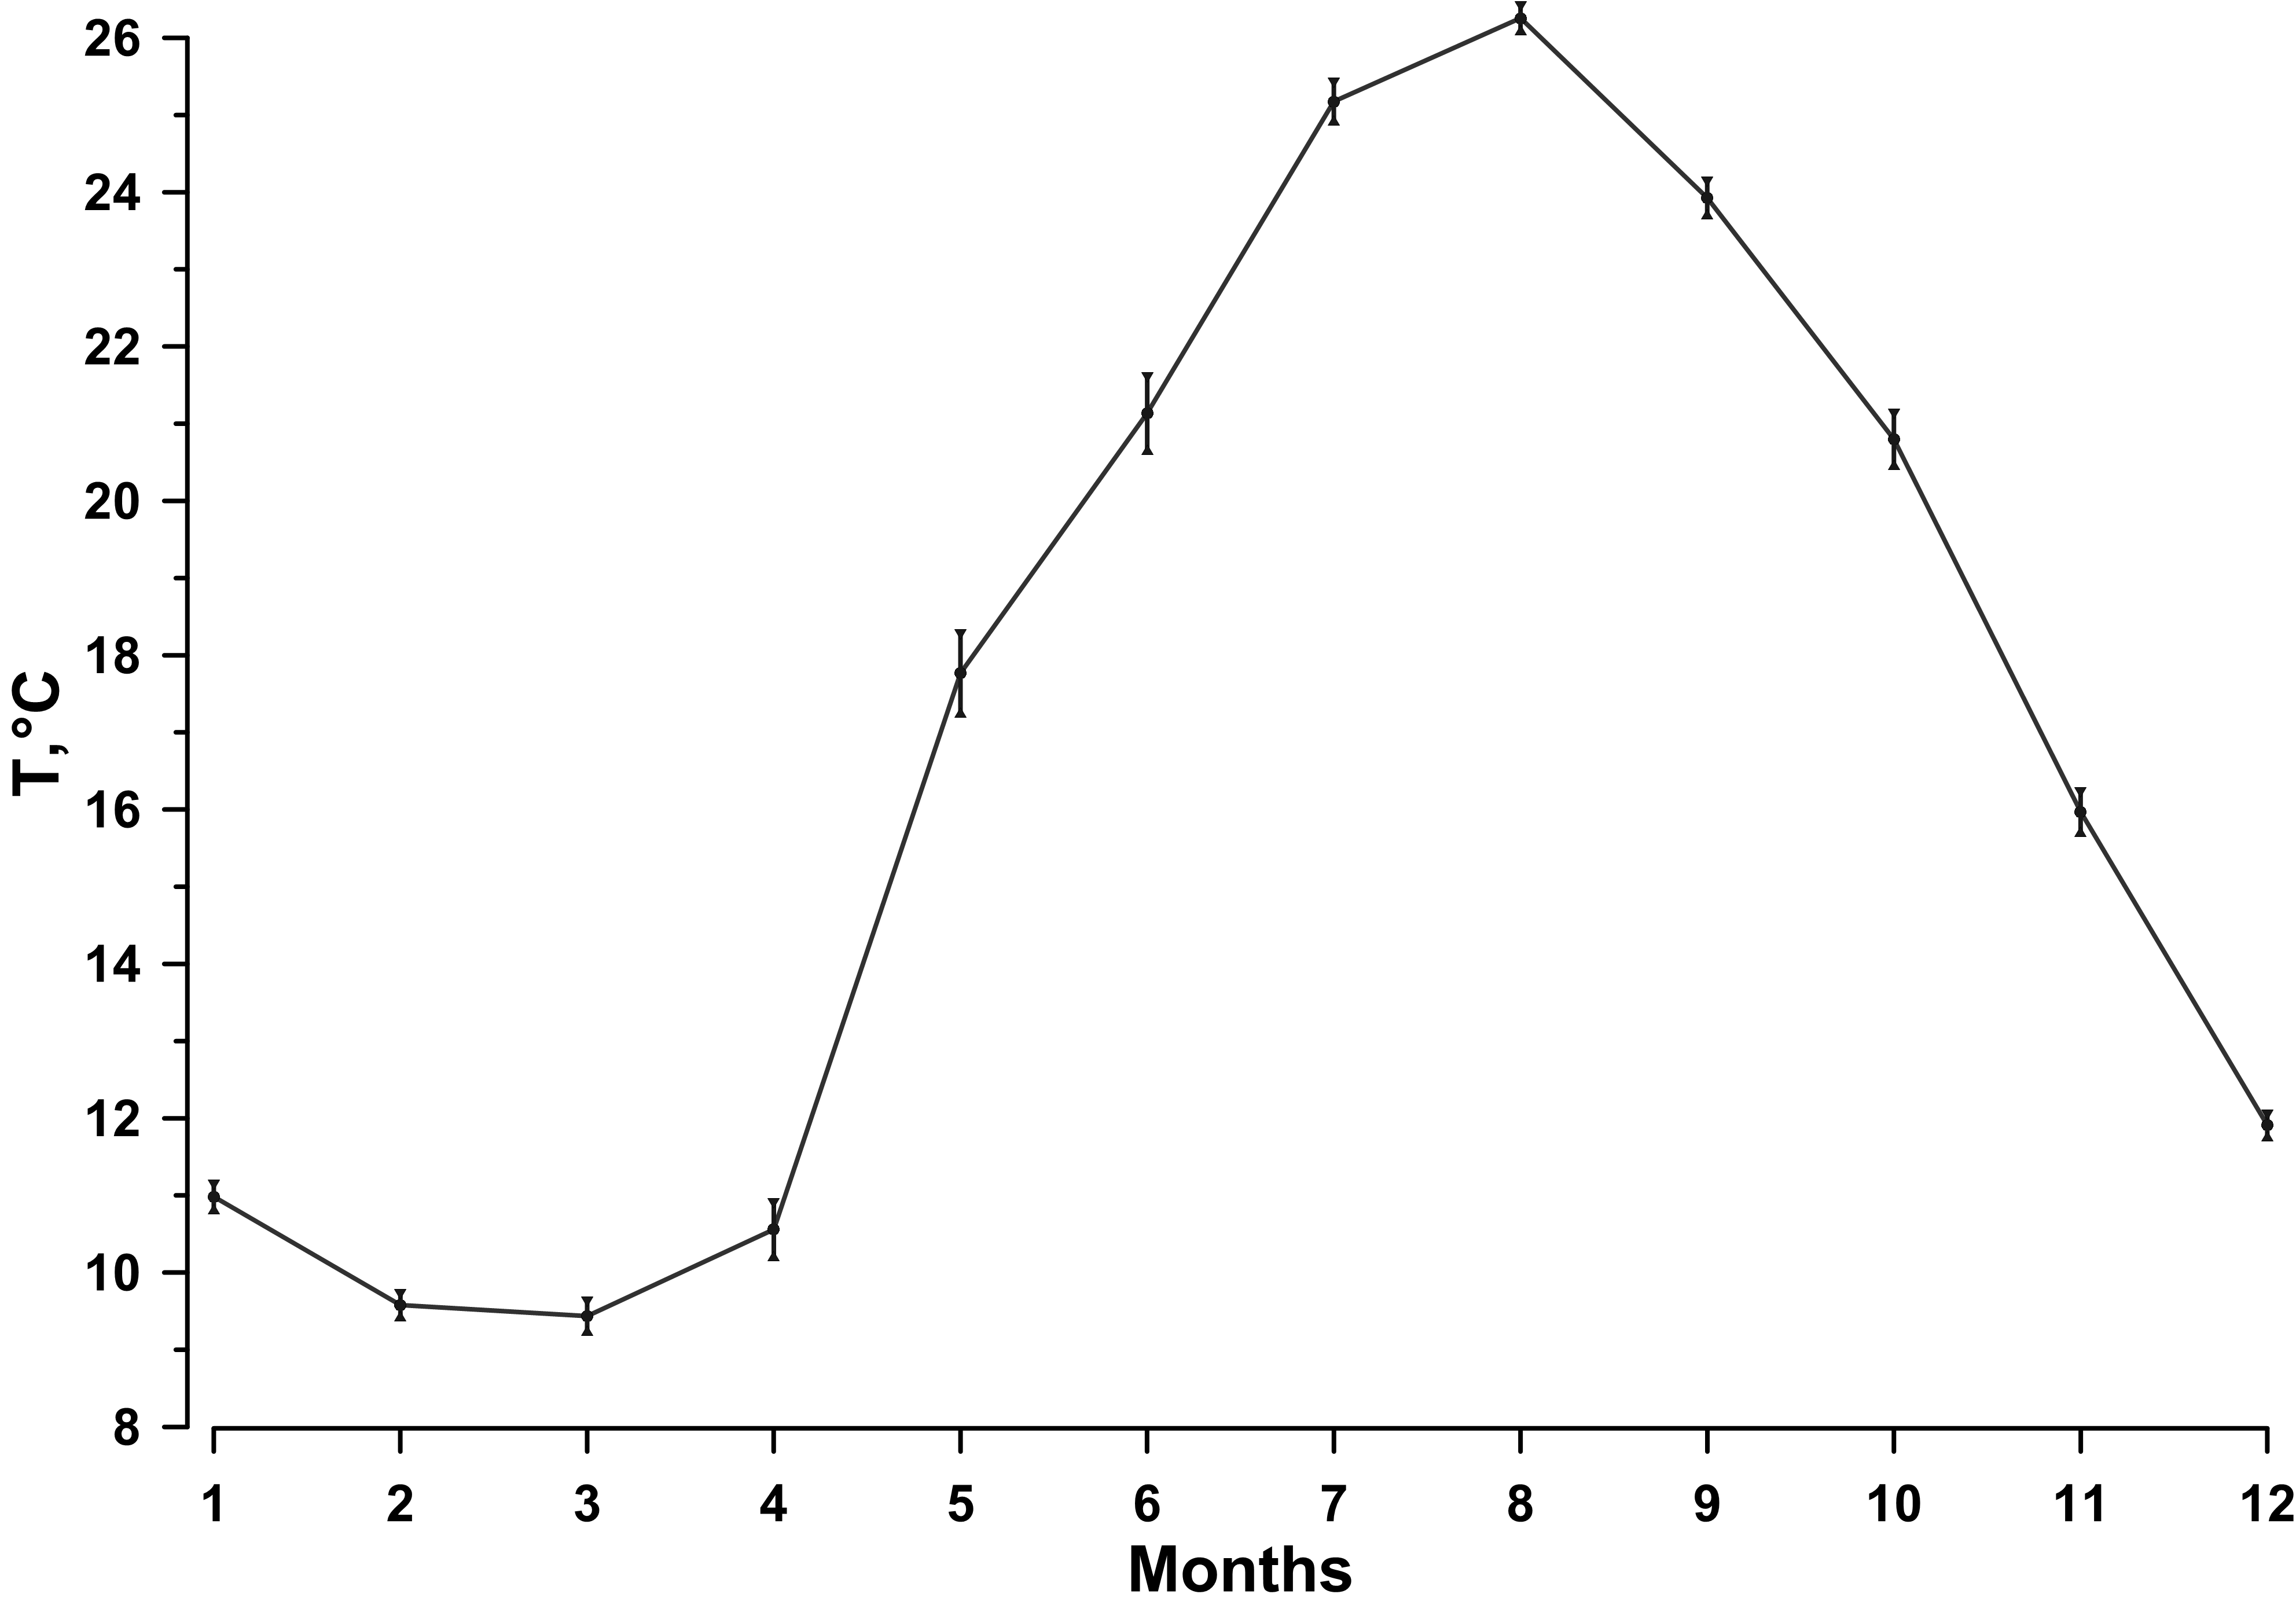


Fig S2. Annual dynamics of water surface temperature based on long-term (2006-2021) data.


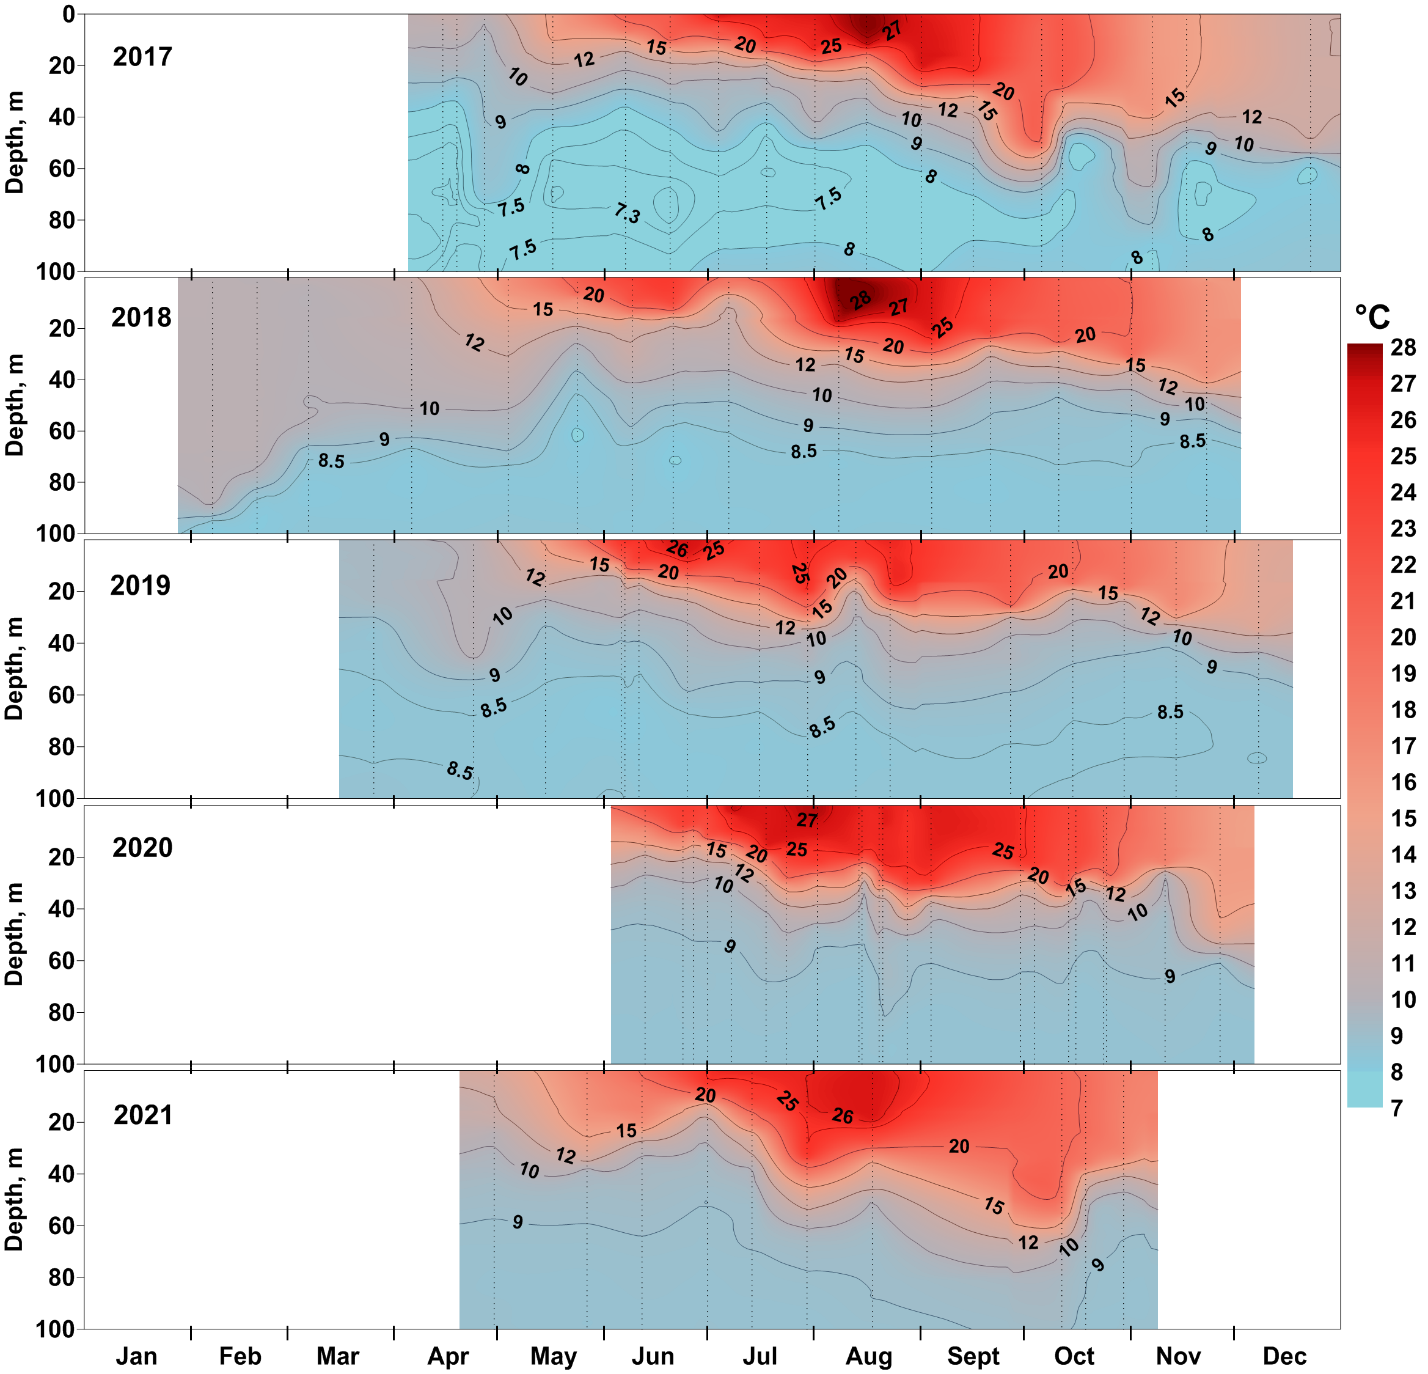


Fig S3. Seasonal dynamic of water temperature at station with depth 500 m from 2017 to 2021.

Table S1. The scheme of experiment for study the influence of nitrates and phosphates supply on phytoplankton growth.

| Variant of experiment | Nitrates (N) | Phosphates (P) |
| --- | --- | --- |
| 1 | - | - |
| 2 | + | - |
| 3 | - | + |
| 4 | + | + |

Table S2. The phytoplankton composition of the upper mixed layer during the dominance of coccolithophorids in late spring and early summer 2017, 2018 and 2019.

| Statistic  parameters | Diatoms | | Dinoflagellates | | Coccolithphores | | | Small  flagellates | |
| --- | --- | --- | --- | --- | --- | --- | --- | --- | --- |
| mg m-3 | % | mg m-3 | % | 106  Cells L-1 | mg m-3 | % | mg m-3 | % |
| 2017 | | | | | | | | | |
| Max | 1427 | 49 | 76.73 | 18 | 9.65 | 1737.22 | 99.00 | 42.11 | 12 |
| Min | 0 | 49 | 3.09 | 0.26 | 1.0 | 188.01 | 49.35 | 4.15 | 0.29 |
| Average | 37.96 | 1.43 | 19.75 | 1.96 | 6.9 | 1241.29 | 94.67 | 16.99 | 1.49 |
| 2018 | | | | | | | | | |
| Max | 23 | 10.07 | 78 | 35.76 | 1.5 | 264 | 74.51 | 141 | 41.06 |
| Min | 0 | 0.07 | 22 | 7.44 | 0.16 | 29 | 22.73 | 12 | 6.46 |
| Average | 10 | 4.54 | 42 | 18.29 | 0.66 | 119 | 48.61 | 58 | 22.21 |
| 2019 | | | | | | | | | |
| Max | 36 | 13.00 | 2468 | 81.47 | 6.0 | 1085 | 87.06 | 112 | 17.18 |
| Min | 0 | 0.00 | 20 | 4.95 | 0.19 | 35 | 14.35 | 20 | 1.83 |
| Average | 13 | 2.12 | 162 | 18.68 | 2.7 | 488 | 69.15 | 54 | 8.40 |

Table S3. The composition of phytoplankton of the upper mixed layer during the dominance of large diatoms in the summer of 2017-2021

| Stations | Depth | Diatoms | | Dinoflagellates | | Coccolithophores | | Small flagellates | |
| --- | --- | --- | --- | --- | --- | --- | --- | --- | --- |
| m | mg m-3 | % | mg m-3 | % | mg m-3 | % | mg m-3 | % |
| 15.08.2017 | | | | | | | | | |
| 500 m | 0 m | 1451.2 | 96.86 | 10.87 | 0.73 | 8.64 | 0.58 | 25.56 | 1.71 |
| 500 m | 5 m | 1609.7 | 98.25 | 14.48 | 0.88 | 4.55 | 0.28 | 7.51 | 0.46 |
| 500 m | 10 m | 439.4 | 92.08 | 16.22 | 3.40 | 10.94 | 2.29 | 5.25 | 1.10 |
| 19.07.2019 | | | | | | | | | |
| 100 m | 0 m | 71.2 | 36.74 | 27.77 | 14.32 | 70.50 | 36.37 | 24.37 | 12.57 |
| 100 m | 10 m | 215 | 67.29 | 32.30 | 10.11 | 53.45 | 16.73 | 18.75 | 5.87 |
| 22.07.2020 | | | | | | | | | |
| 500 m | 0 m | 3619.4 | 98.48 | 10.80 | 0.29 | 0.00 | 0.00 | 40.86 | 1.11 |
| 500 м | 15 м | 4300.9 | 95.52 | 87.15 | 1.94 | 17.,44 | 0.39 | 84.39 | 1.87 |
| 31.07.2020 | | | | | | | | | |
| 500 m | 14 m | 1462.4 | 96.54 | 22.69 | 1.50 | 0.00 | 0.00 | 29.28 | 1.93 |
|  |  |  | 16.08.2020 | | | |  |  |  |
| 500 m | 0 m | 733.9 | 88.18 | 2.29 | 0.28 | 11.40 | 1.37 | 44.14 | 5.30 |
| 26.08.2020 | | | | | | | |  |  |
| 500 m | 0 m | 365.3 | 84.29 | 2.63 | 0.61 | 3.17 | 0.73 | 49.63 | 11.45 |
| 500 m | 10 m | 257.75 | 77.35 | 46.46 | 13.94 | 10.02 | 3.01 | 18.15 | 5.45 |
| 17.08.2021 | | | | | | | | | |
| 500 m | 0 m | 3914.82 | 95.32 | 23.05 | 0.56 | 7.26 | 0.18 | 137.89 | 3.36 |

Table S4. Vertical distribution of nitrogen and phosphorus concentrations during the dominance of coccolithophore *E. huxleyi* (11.06.2020) and large diatoms *P. calcar-avis* (26.08.2021) at the station above a depth of 500 m.

| *E. huxleyi* | | |
| --- | --- | --- |
| m | P | N |
| 1 | 0.22 | 0.31 |
| 14 | 0.16 | 0.36 |
| 33 | 0.18 | 0.29 |
| 50 | 0.20 | 0.42 |
| 70 | 0.26 | 1.19 |
| 90 | 0.32 | 1.29 |
| 107 | 0.42 | 2.26 |
| 119 | 0.78 | 3.73 |
| 127 | 1.23 | 5.97 |
| 131 | 1.30 | 5.94 |
| 139 | 1.34 | 6.19 |
| 151 | 1.38 | 3.38 |
| 154 | 1.62 | 3.42 |
| *P. calcar-avis* | | |
| 1 | 0.06 | 1.31 |
| 10 | 0.04 | 1.35 |
| 36 | 0.04 | 1.56 |
| 50 | 0.07 | 1.64 |
| 70 | 0.15 | 2.25 |
| 98 | 1.10 | 5.00 |
| 111 | 1.13 | 6.80 |
| 122 | 1.26 | 4.01 |
| 129 | 1.36 | 3.91 |
| 135 | 0.36 | 1.44 |
| 138 | 2.57 | 1.99 |
| 142 | 6.62 | 2.23 |
| 146 | 6.90 | 3.49 |
| 150 | 7.05 | 5.44 |
